# Supplementary material
Source: MDPI journal article supplement (https://www.mdpi.com/search?q=animals-09-00273)

## Supplementary files: Differential Expression of KCNJ12 Gene and Association Analysis of Its Missense Mutation with Growth Traits in Chinese Cattle

Table S1. Detailed information about cattle records.

| Breeds               | Housed | Collected Record |     |      |      |         |     |
|----------------------|--------|------------------|-----|------|------|---------|-----|
|                      |        | Ages (years)     |     |      | Sex  |         |     |
|                      |        | ≤1.5             | 2–3 | ≥3.5 | Sire | Bullock | Dam |
| PN ( <i>n</i> = 372) | Yes    | 0                | 278 | 94   | 0    | 0       | 372 |
| JN ( <i>n</i> = 205) | Yes    | 0                | 180 | 25   | 0    | 0       | 205 |
| XN ( <i>n</i> = 243) | Yes    | 0                | 243 | 0    | 16   | 30      | 197 |

PN: Pinan cattle; JN: Jin'nan cattle; XN: Xia'nan cattle.

Table S2. Primer information for the PCR amplification of the bovine *KCNJ12* gene.

| Primer Name | Primer Sequences (5'–3') | Position (AC_000176) | Amplicon Size (bp) |
|-------------|--------------------------|----------------------|--------------------|
| P1          | F: CATAGGCTGCTGGTGGGT    | 35,953,344–          | 470                |
|             | R: GGAGGGAAGAGGCTCAGTT   | 35,953,813           |                    |
| P2          | F: CCATTTGCTGGAAGTGTCTC  | 35,953,663–          | 897                |
|             | R: CCAGTCTGAACCCTTGCTC   | 35,954,559           |                    |
| P3          | F: AAGCCATCCTCCTTGTTAGA  | 35,954,370–          | 548                |
|             | R: GGACTCCTTTCCCGTTGC    | 35,954,917           |                    |
| P4          | F: GAGGAGCACAGAAAGAAAGCA | 35,954,788–          | 1230               |
|             | R: GGGGAGAAAGGGGAGAAAA   | 35,956,017           |                    |
| P5          | F: AGCCTGGGATCAGATAGCAGC | 35,955,547–          | 874                |
|             | R: CACTCGCCAGCGGAGAACA   | 35,956,420           |                    |
| P6          | F: GCTCCGACTTCATAGGGT    | 35,982,793–          | 912                |
|             | R: TGGGTGGTCAAGCGTGTA    | 35,983,704           |                    |
| P7          | F: GATGGAGGCGTGGAGGTT    | 35,989,184–          | 1177               |
|             | R: CGTCTTGTGGAAATGCGAGT  | 35,990,360           |                    |
| P8          | F: GTCACGGAGGAGGGCGAGTA  | 35,990,025–          | 1169               |
|             | R: CGGCACCATCAGGCACAT    | 35,991,193           |                    |
| P9          | F: TTCGGCTTTCTCAATCTTAG  | 35,990,978–          | 815                |
|             | R: GTTCAGCATCAGGGCATAG   | 35,991,792           |                    |
| P10         | F: CACAGGCTTGTCTTGATGG   | 35,991,909–          | 803                |
|             | R: GGGCACTAAAGAGGGAGAC   | 35,992,711           |                    |
| P11         | F: AAAGGGTCAATCCCAAGC    | 35,992,251–          | 907                |
|             | R: TCCAGGAAAAGCCGTCAC    | 35,993,157           |                    |

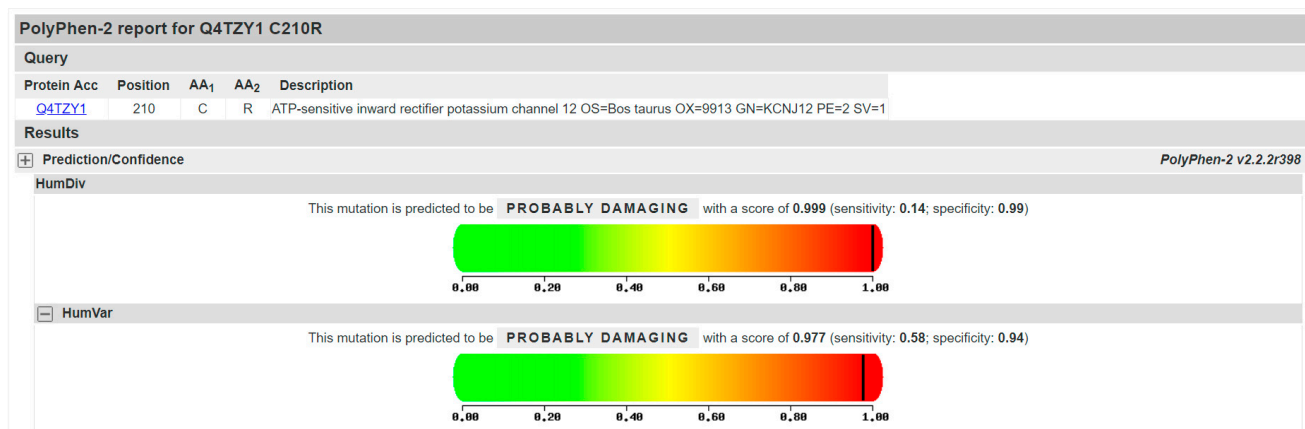

(A)

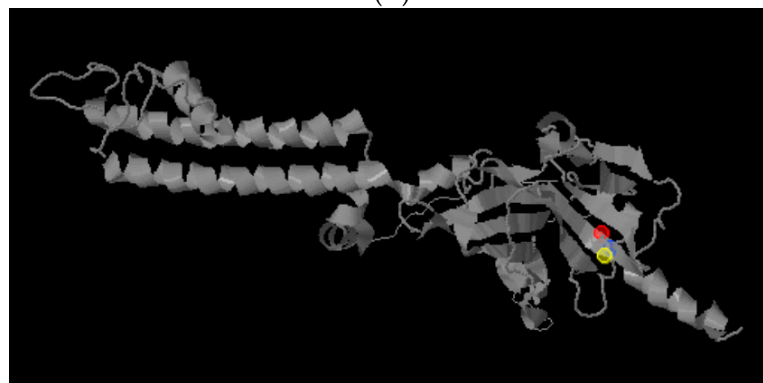

(B)

**Figure S1.** This missense mutation probably alters the protein (as determined using PolyPhen). (A) This mutation is predicted to be PROBABLY DAMAGING with a score of 0.999 in HumDiv; and this mutation is predicted to be PROBABLY DAMAGING with a score of 0.977 in HumVar. (B) Inward-rectifier potassium channel Kir2.2 in complex with PIP2. The colorful circles are residue 210 (Cys>Arg), which was an SNP at the DNA level.

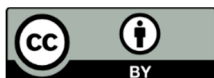

Supplement: s001 [file animals-09-00273-s001.pdf]
